# Supplementary material for: Association between NTRK2 Polymorphisms, Hippocampal Volumes and Treatment Resistance in Major Depressive Disorder
Source: MDPI journal article supplement (doi:10.3390/genes14112037), 2023-11-03
Supplement: s1 [file s1]

## Supplementary Material

**Supplementary Table S1:** Polymorphisms distribution in the study sample.

| Variant name  | Gene (Chr.) | Alleles | AA (n. subj) | AB (n. subj) | BB (n. subj) | MapInfo  |
|---------------|-------------|---------|--------------|--------------|--------------|----------|
| rs1187350     | NTRK2 (9)   | [A/G]   | 29           | 65           | 27           | 87295237 |
| rs1619120     | NTRK2 (9)   | [A/G]   | 23           | 57           | 41           | 87302196 |
| rs1187343     | NTRK2 (9)   | [A/G]   | 37           | 64           | 19           | 87308783 |
| rs1187337     | NTRK2 (9)   | [T/C]   | 27           | 64           | 30           | 87316037 |
| rs11140745    | NTRK2 (9)   | [T/C]   | 12           | 55           | 54           | 87355358 |
| rs1573219     | NTRK2 (9)   | [A/G]   | 10           | 56           | 54           | 87387622 |
| rs1443440     | NTRK2 (9)   | [T/C]   | 69           | 43           | 7            | 87406168 |
| rs1899640     | NTRK2 (9)   | [A/G]   | 53           | 56           | 12           | 87409025 |
| rs1187287     | NTRK2 (9)   | [A/G]   | 3            | 42           | 76           | 87414794 |
| rs1187286     | NTRK2 (9)   | [T/G]   | 64           | 49           | 8            | 87415028 |
| rs716893      | NTRK2 (9)   | [A/G]   | 14           | 55           | 52           | 87419117 |
| rs3739804     | NTRK2 (9)   | [A/G]   | 97           | 23           | 1            | 87421631 |
| rs10512154    | NTRK2 (9)   | [A/G]   | 6            | 50           | 65           | 87441475 |
| rs2083828     | NTRK2 (9)   | [A/C]   | 20           | 65           | 36           | 87447045 |
| rs7855888     | NTRK2 (9)   | [T/C]   | 68           | 47           | 6            | 87452058 |
| rs1838158     | NTRK2 (9)   | [A/G]   | 96           | 24           | 1            | 87473009 |
| rs10116287    | NTRK2 (9)   | [T/G]   | 79           | 35           | 7            | 87477274 |
| rs7048015     | NTRK2 (9)   | [A/C]   | 92           | 27           | 2            | 87478135 |
| rs10780691    | NTRK2 (9)   | [T/C]   | 31           | 66           | 24           | 87491253 |
| rs10868238    | NTRK2 (9)   | [T/C]   | 18           | 65           | 38           | 87530935 |
| rs12340212    | NTRK2 (9)   | [A/G]   | 0            | 26           | 95           | 87551964 |
| rs6559838     | NTRK2 (9)   | [T/C]   | 2            | 31           | 88           | 87553563 |
| rs2808707     | NTRK2 (9)   | [T/G]   | 19           | 62           | 40           | 87558294 |
| rs6559840     | NTRK2 (9)   | [T/C]   | 4            | 45           | 72           | 87575500 |
| rs3860945     | NTRK2 (9)   | [A/G]   | 87           | 33           | 1            | 87585624 |
| rs4877894     | NTRK2 (9)   | [A/G]   | 40           | 64           | 17           | 87590382 |
| rs10868241    | NTRK2 (9)   | [A/G]   | 4            | 54           | 63           | 87593028 |
| rs4361832     | NTRK2 (9)   | [A/G]   | 2            | 44           | 75           | 87595734 |
| rs1948308     | NTRK2 (9)   | [A/G]   | 43           | 57           | 21           | 87616257 |
| rs923559      | NTRK2 (9)   | [A/G]   | 4            | 50           | 67           | 87616532 |
| rs1387924     | NTRK2 (9)   | [T/G]   | 1            | 40           | 80           | 87632993 |
| rs10835189    | BDNF (11)   | [T/G]   | 30           | 70           | 21           | 27541995 |
| rs7127239     | BDNF (11)   | [A/C]   | 0            | 29           | 92           | 27547379 |
| exm-rs988712  | BDNF (11)   | [T/G]   | 12           | 49           | 60           | 27563382 |
| exm-rs7481311 | BDNF (11)   | [T/C]   | 0            | 30           | 91           | 27583129 |
| rs10835201    | BDNF (11)   | [A/G]   | 91           | 30           | 0            | 27618265 |
| rs10734394    | BDNF (11)   | [A/G]   | 60           | 49           | 12           | 27628412 |
| rs1387144     | BDNF (11)   | [A/C]   | 48           | 57           | 16           | 27635319 |

|                |           |       |    |    |    |          |
|----------------|-----------|-------|----|----|----|----------|
| rs6416056      | BDNF (11) | [A/G] | 54 | 50 | 17 | 27646745 |
| rs4074134      | BDNF (11) | [T/C] | 9  | 47 | 65 | 27647285 |
| exm-rs925946   | BDNF (11) | [T/G] | 3  | 34 | 84 | 27667202 |
| rs1519480      | BDNF (11) | [T/C] | 79 | 39 | 3  | 27675712 |
| rs6265         | BDNF (11) | [T/C] | 7  | 40 | 74 | 27679916 |
| rs10835210     | BDNF (11) | [A/C] | 27 | 57 | 34 | 27695910 |
| rs10835211     | BDNF (11) | [A/G] | 2  | 30 | 89 | 27701365 |
| exm-rs10767664 | BDNF (11) | [A/T] | 62 | 44 | 12 | 27725986 |
| rs2030323      | BDNF (11) | [A/C] | 13 | 45 | 63 | 27728539 |
| rs7934165      | BDNF (11) | [A/G] | 33 | 60 | 28 | 27731983 |

**Supplementary Table S2:** effect of polymorphisms on Hippocampal volumes and treatment resistance.  
Statistical significance (p) reported.

| Variant name | Genetic model | Hippocampus, right (p) | Hippocampus, left (p) | Treatment resistance (p) |
|--------------|---------------|------------------------|-----------------------|--------------------------|
| rs1187350    | AA vs AB + BB | 0.12881647             | 0.13746592            | 0.81797011               |
|              | AA + AB vs BB | 0.61453020             | 0.50403903            | 0.87007879               |
|              | AA + BB vs AB | 0.38409898             | 0.48089286            | 0.95212864               |
| rs1619120    | AA vs AB + BB | 0.90512449             | 0.53026059            | 0.43954745               |
|              | AA + AB vs BB | 0.06137145             | 0.02992682            | 0.55504501               |
|              | AA + BB vs AB | 0.09409391             | 0.12104164            | 0.96215809               |
| rs1187343    | AA vs AB + BB | 0.05056225             | 0.06276421            | 0.59114335               |
|              | AA + AB vs BB | 0.08362525             | 0.04069298            | 0.42065316               |
|              | AA + BB vs AB | 0.59789403             | 0.82961192            | 0.92286221               |
| rs1187337    | AA vs AB + BB | 0.38338555             | 0.18610124            | 0.83717457               |
|              | AA + AB vs BB | 0.05689802             | 0.04652495            | 0.63953707               |
|              | AA + BB vs AB | 0.36604759             | 0.54669268            | 0.56537834               |
| rs11140745   | AA vs AB + BB | 0.82586438             | 0.76690087            | 0.21701167               |
|              | AA + AB vs BB | 0.40765706             | 0.88056239            | 0.92358819               |
|              | AA + BB vs AB | 0.48849884             | 0.97601280            | 0.51851537               |
| rs1573219    | AA vs AB + BB | 0.46873208             | 0.34742606            | 0.47448297               |
|              | AA + AB vs BB | 0.22875811             | 0.67148275            | 0.93795238               |
|              | AA + BB vs AB | 0.42892147             | 0.91814876            | 0.74839792               |
| rs1443440    | AA vs AB + BB | 0.81231725             | 0.93743066            | 0.18120329               |
|              | AA + AB vs BB | 0.34902998             | 0.23668678            | 0.19352706               |
|              | AA + BB vs AB | 0.82100118             | 0.60734721            | 0.46472164               |
| rs1899640    | AA vs AB + BB | 0.21975924             | 0.70057145            | 0.95497601               |
|              | AA + AB vs BB | 0.72336955             | 0.95558686            | 0.55817769               |
|              | AA + BB vs AB | 0.31586389             | 0.72761492            | 0.68362160               |
| rs1187287    | AA vs AB + BB | 0.52108265             | 0.49261727            | 0.56021958               |
|              | AA + AB vs BB | 0.56289134             | 0.66685098            | 0.42590558               |
|              | AA + BB vs AB | 0.42340588             | 0.50638406            | 0.53577933               |
| rs1187286    | AA vs AB + BB | 0.31061448             | 0.60167944            | 0.66431553               |
|              | AA + AB vs BB | 0.55732905             | 0.46304479            | 0.98628843               |
|              | AA + BB vs AB | 0.46367785             | 0.87621602            | 0.66491313               |
| rs716893     | AA vs AB + BB | 0.75973033             | 0.50061795            | 0.08103649               |
|              | AA + AB vs BB | 0.77193339             | 0.90528601            | 0.57040382               |
|              | AA + BB vs AB | 0.62390692             | 0.57362650            | 0.08775880               |
| rs3739804    | AA vs AB + BB | 0.87344608             | 0.76299037            | 0.57208665               |
|              | AA + AB vs BB | 0.56681855             | 0.75354214            | -                        |
|              | AA + BB vs AB | 0.90016046             | 0.81366619            | 0.74376451               |
| rs10512154   | AA vs AB + BB | 0.36047348             | 0.05110025            | 0.07887819               |
|              | AA + AB vs BB | 0.53826500             | 0.40386930            | 0.72550695               |
|              | AA + BB vs AB | 0.28966741             | 0.07702177            | 0.26098935               |
| rs2083828    | AA vs AB + BB | 0.81044504             | 0.77174660            | 0.97975878               |

|               |               |                   |            |                   |
|---------------|---------------|-------------------|------------|-------------------|
|               | AA + AB vs BB | 0.51604190        | 0.48180596 | 0.45837551        |
|               | AA + BB vs AB | 0.68290057        | 0.67463674 | 0.48423824        |
| rs7855888     | AA vs AB + BB | 0.02033028        | 0.00923203 | 0.84410085        |
|               | AA + AB vs BB | 0.44823561        | 0.61751472 | 0.94127165        |
|               | AA + BB vs AB | 0.00675813        | 0.00399182 | 0.86736039        |
|               | AA vs AB + BB | 0.81759058        | 0.64582867 | 0.04324420        |
| rs1838158     | AA + AB vs BB | 0.48817413        | 0.17094599 | -                 |
|               | AA + BB vs AB | 0.93903970        | 0.87609723 | 0.02169181        |
| rs10116287    | AA vs AB + BB | 0.02430848        | 0.03127852 | 0.14944726        |
|               | AA + AB vs BB | 0.21583179        | 0.34308771 | 0.65434317        |
|               | AA + BB vs AB | 0.09145789        | 0.08228071 | 0.08288701        |
|               | AA vs AB + BB | 0.93944470        | 0.34608860 | 0.60548157        |
| rs7048015     | AA + AB vs BB | 0.80628848        | 0.63316810 | -                 |
|               | AA + BB vs AB | 0.87737326        | 0.26625216 | 0.93870674        |
| rs10780691    | AA vs AB + BB | 0.16842735        | 0.13726942 | 0.84006786        |
|               | AA + AB vs BB | 0.20433280        | 0.24990255 | 0.69297711        |
|               | AA + BB vs AB | 0.84784974        | 0.70358912 | 0.89017694        |
| rs10868238    | AA vs AB + BB | 0.61620071        | 0.94488637 | 0.29548969        |
|               | AA + AB vs BB | 0.17104885        | 0.22804506 | 0.41370905        |
|               | AA + BB vs AB | 0.35757763        | 0.28282214 | 0.13436442        |
| rs12340212    | AA vs AB + BB | -                 | -          | -                 |
|               | AA + AB vs BB | 0.33144622        | 0.20611303 | 0.01259715        |
|               | AA + BB vs AB | -                 | -          | -                 |
| rs6559838     | AA vs AB + BB | 0.38872541        | 0.08194939 | -                 |
|               | AA + AB vs BB | 0.10909464        | 0.29673016 | 0.12290434        |
|               | AA + BB vs AB | 0.16790988        | 0.57465986 | 0.27645329        |
| rs2808707     | AA vs AB + BB | 0.18307919        | 0.30822029 | 0.39250288        |
|               | AA + AB vs BB | 0.28912152        | 0.73701278 | 0.71739129        |
|               | AA + BB vs AB | 0.95474247        | 0.68288521 | 0.78998991        |
| rs6559840     | AA vs AB + BB | 0.16615199        | 0.37674664 | 0.98828254        |
|               | AA + AB vs BB | 0.91276063        | 0.84896404 | 0.63549670        |
|               | AA + BB vs AB | 0.67827500        | 0.59873573 | 0.63526987        |
| rs3860945     | AA vs AB + BB | 0.90400950        | 0.98155510 | 0.59682443        |
|               | AA + AB vs BB | 0.46186668        | 0.84954047 | -                 |
|               | AA + BB vs AB | 0.97681063        | 0.95026456 | 0.76571676        |
| rs4877894     | AA vs AB + BB | 0.00429649        | 0.04341798 | 0.10486081        |
|               | AA + AB vs BB | 0.20431480        | 0.43566178 | 0.61984364        |
|               | AA + BB vs AB | 0.00025793        | 0.01310722 | 0.05959438        |
| rs10868241    | AA vs AB + BB | 0.82082463        | 0.70970832 | 0.96184390        |
|               | AA + AB vs BB | 0.11505766        | 0.30581381 | 0.09339024        |
|               | AA + BB vs AB | 0.13300534        | 0.37065268 | 0.09471939        |
| rs4361832     | AA vs AB + BB | 0.54986351        | 0.90109945 | -                 |
|               | AA + AB vs BB | 0.03848347        | 0.21620810 | 0.31263665        |
|               | AA + BB vs AB | 0.05323393        | 0.19793818 | 0.31753188        |
| rs1948308     | AA vs AB + BB | 0.00724631        | 0.05517540 | 0.01097101        |
|               | AA + AB vs BB | 0.09557664        | 0.11551445 | 0.05212992        |
|               | AA + BB vs AB | <b>0.00008164</b> | 0.00202752 | <b>0.00007461</b> |
| rs923559      | AA vs AB + BB | 0.61500825        | 0.84861136 | 0.28726704        |
|               | AA + AB vs BB | 0.04735609        | 0.12547950 | 0.01329093        |
|               | AA + BB vs AB | 0.02787157        | 0.10420068 | 0.00385164        |
| rs1387924     | AA vs AB + BB | 0.51352646        | 0.81410576 | -                 |
|               | AA + AB vs BB | 0.02176759        | 0.12020412 | 0.10507655        |
|               | AA + BB vs AB | 0.02937639        | 0.10749887 | 0.06911655        |
| rs10835189    | AA vs AB + BB | 0.07797557        | 0.15100154 | 0.70057082        |
|               | AA + AB vs BB | 0.85825516        | 0.79540367 | 0.78304676        |
|               | AA + BB vs AB | 0.16494460        | 0.29583741 | 0.90026863        |
| rs7127239     | AA vs AB + BB | -                 | -          | -                 |
|               | AA + AB vs BB | 0.04963697        | 0.10503677 | 0.36278078        |
|               | AA + BB vs AB | -                 | -          | -                 |
| exm-rs988712  | AA vs AB + BB | 0.36167915        | 0.36823156 | 0.58996994        |
|               | AA + AB vs BB | 0.95845898        | 0.79780070 | 0.31797526        |
|               | AA + BB vs AB | 0.61811543        | 0.42089664 | 0.48940691        |
| exm-rs7481311 | AA vs AB + BB | -                 | -          | -                 |
|               | AA + AB vs BB | 0.11942532        | 0.23322491 | 0.47937436        |
|               | AA + BB vs AB | -                 | -          | -                 |
| rs10835201    | AA vs AB + BB | 0.11942532        | 0.23322491 | 0.47937436        |
|               | AA + AB vs BB | -                 | -          | -                 |
|               | AA + BB vs AB | -                 | -          | -                 |

|                |               |            |            |            |
|----------------|---------------|------------|------------|------------|
| rs10734394     | AA vs AB + BB | 0.95845898 | 0.79780070 | 0.31797526 |
|                | AA + AB vs BB | 0.60142087 | 0.61984827 | 0.58759876 |
|                | AA + BB vs AB | 0.79163455 | 0.57358693 | 0.49068007 |
| rs1387144      | AA vs AB + BB | 0.12046321 | 0.05960440 | 0.23733065 |
|                | AA + AB vs BB | 0.46911116 | 0.76096103 | 0.62716773 |
|                | AA + BB vs AB | 0.04144863 | 0.03838271 | 0.13459470 |
| rs6416056      | AA vs AB + BB | 0.17035485 | 0.17960163 | 0.57385751 |
|                | AA + AB vs BB | 0.85152197 | 0.83694733 | 0.83650955 |
|                | AA + BB vs AB | 0.12785784 | 0.13191716 | 0.47395732 |
| rs4074134      | AA vs AB + BB | 0.90594925 | 0.95696991 | 0.30997234 |
|                | AA + AB vs BB | 0.47191756 | 0.37323237 | 0.61934701 |
|                | AA + BB vs AB | 0.42354483 | 0.34689753 | 0.97418477 |
| exm-rs925946   | AA vs AB + BB | 0.94802551 | 0.37869057 | 0.69513768 |
|                | AA + AB vs BB | 0.82458435 | 0.69989164 | 0.18807966 |
|                | AA + BB vs AB | 0.83589378 | 0.92231951 | 0.13725887 |
| rs1519480      | AA vs AB + BB | 0.57285281 | 0.47676941 | 0.02595799 |
|                | AA + AB vs BB | 0.94802551 | 0.37869057 | 0.69513768 |
|                | AA + BB vs AB | 0.54723065 | 0.30622983 | 0.01589717 |
| rs6265         | AA vs AB + BB | 0.84235532 | 0.84386217 | 0.22740261 |
|                | AA + AB vs BB | 0.81089678 | 0.45919276 | 0.49774485 |
|                | AA + BB vs AB | 0.72890276 | 0.38690601 | 0.91024038 |
| rs10835210     | AA vs AB + BB | 0.18641017 | 0.20845558 | 0.47168931 |
|                | AA + AB vs BB | 0.34614058 | 0.20825930 | 0.08974604 |
|                | AA + BB vs AB | 0.79926828 | 0.93465778 | 0.35596612 |
| rs10835211     | AA vs AB + BB | 0.98332878 | 0.61103824 | -          |
|                | AA + AB vs BB | 0.84153351 | 0.75952447 | 0.47686896 |
|                | AA + BB vs AB | 0.84239760 | 0.64440750 | 0.49972208 |
| exm-rs10767664 | AA vs AB + BB | 0.66253113 | 0.54159227 | 0.86381979 |
|                | AA + AB vs BB | 0.64227193 | 0.79976920 | 0.60495442 |
|                | AA + BB vs AB | 0.87246580 | 0.63674106 | 0.88463239 |
| rs2030323      | AA vs AB + BB | 0.63738662 | 0.72381612 | 0.76598851 |
|                | AA + AB vs BB | 0.67425113 | 0.51526175 | 0.92798032 |
|                | AA + BB vs AB | 0.89583978 | 0.65659975 | 0.92210801 |
| rs7934165      | AA vs AB + BB | 0.22974800 | 0.30059855 | 0.25988626 |
|                | AA + AB vs BB | 0.85988862 | 0.50969048 | 0.41486009 |
|                | AA + BB vs AB | 0.35958768 | 0.72004069 | 0.75594346 |

**Supplementary Table S3:** details on prescribed pharmacotherapies.

|                                 |    |
|---------------------------------|----|
| <b>Whole sample (n=121)</b>     |    |
| SSRIs                           | 74 |
| SNRIs                           | 35 |
| TCAs                            | 12 |
| <b>Add-on treatments (n=31)</b> |    |
| Amisulpride (25-50 mg/die)      | 11 |
| Mirtazapine (15-30 mg/die)      | 16 |
| Low dosage antipsychotic        | 3  |
| Mood stabilizer                 | 1  |
